# Supplementary material for: Colored Shade Nets Can Relieve Abnormal Fruit Softening and Premature Leaf Senescence of “Jumeigui” Grapes during Ripening under Greenhouse Conditions
Source: MDPI journal article supplement (doi:10.3390/plants11091227), 2022-05-01
Supplement: s1 [file s1]

## Article

# Colored Shade Nets Can Relieve Abnormal Fruit Softening and Premature Leaf Senescence of “Jumeigui” Grapes during Ripening under Greenhouse Conditions

Qian Zha <sup>1,2</sup>, Xiangjing Yin <sup>1,2</sup>, Xiaojun Xi <sup>1,2,\*</sup> and Aili Jiang <sup>1,2,\*</sup>

<sup>1</sup> Research Institute of Forestry and Pomology, Shanghai Academy of Agricultural Sciences, Shanghai 201403, China; zhaqian@saas.sh.cn (Q.Z.); yinxiangjing@saas.sh.cn (X.Y.).

<sup>2</sup> Shanghai Key Labs of the Protected Horticultural Technology, Shanghai Academy of Agricultural Sciences, Shanghai 201403, China.

\* Correspondence: xxj220401@126.com (X.X.); putaojal@163.com (A.J.)

## Supplementary Material

**Table S1.** Definitions of chlorophyll *a* fluorescence parameters.

| Parameter             | Definition                                                                                                                                                                                                               |
|-----------------------|--------------------------------------------------------------------------------------------------------------------------------------------------------------------------------------------------------------------------|
| $F_v/F_m = \Phi_{Po}$ | Maximum photochemical efficiency                                                                                                                                                                                         |
| $\Psi_{Eo}$           | The ratio of excitons captured by the reaction center and used to promote electron transfer to other electron acceptors in the electron transport chain exceeding $Q_A$ to promote $Q_A$ reduction excitons ( $t = 0$ ). |
| $\Phi_{Eo}$           | Quantum yield for electron transfer ( $t = 0$ ).                                                                                                                                                                         |
| $\delta_{Ro}$         | Probability of electrons passing from the intersystem electron transfer body to the electron acceptor on the acceptor side of the PSI.                                                                                   |
| $W_k$                 | Ratio of K-phase variable fluorescence to J-phase variable fluorescence.                                                                                                                                                 |
| $Mo$                  | Approximate initial slope of transient fluorescence, $V = f(t)$ (per ms). This parameter reflects the closing rate of PSII active reaction centers (RCs).                                                                |
| $PI_{ABS}$            | Performance index based on absorption of light energy                                                                                                                                                                    |

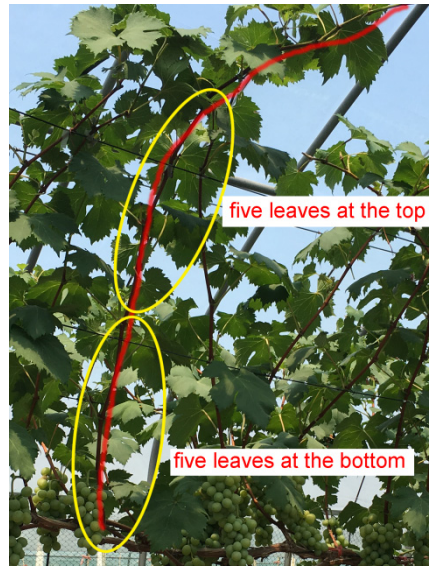

**Figure S1.** Distribution of the five leaves at the top and five leaves at the bottom on the fruiting branches of grapes.

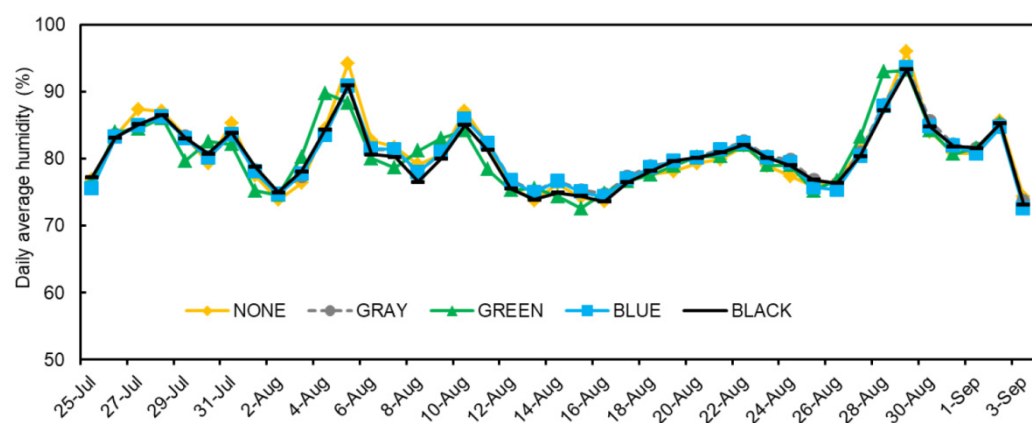

**Figure S2.** Daily average humidity trend in the facility greenhouse under the colored shading materials.

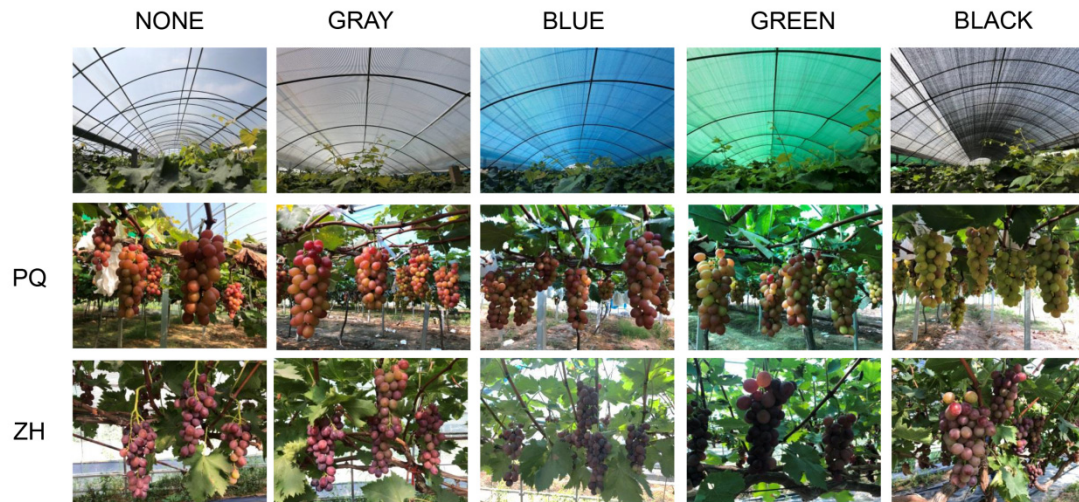

**Figure S3.** Field performance of grape berries under different treatments.

NONE: no shading; GRAY, BLUE, GREEN, and BLACK: shade net colors. PQ and ZH: experimental vineyard sites at the Shanghai Pingqi Grape Planting Professional Cooperative (30°11'N, 121°25'E), and at Zhuanghang, the site at the Shanghai Academy of Agricultural Sciences, Shanghai, China (30°51'N, 121°13'E), respectively.
